# Supplementary material for: Rainfall and Temperature Modify Effects of On-Site Sanitation Intervention on E. coli Contamination in Bangladeshi Households
Source: bioRxiv or medRxiv preprint supplement (doi:10.1101/2024.08.22.24312444), 2024-08-22
Supplement: Supplementary file [file media-1.pdf]

## Supplementary Material

### Rainfall and Temperature Modify Effects of On-Site Sanitation Intervention on *E. coli* Contamination in Bangladeshi Households

Caitlin G. Niven<sup>1\*</sup>, Mahfuza Islam<sup>2</sup>, Anna Nguyen<sup>3</sup>, Andrew Mertens<sup>4</sup>, Amy J. Pickering<sup>5,6</sup>, Laura H. Kwong<sup>2</sup>, Mahfuja Alam<sup>7</sup>, Debashis Sen<sup>7</sup>, Sharmin Islam<sup>7</sup>, Mahbubur Rahman<sup>7</sup>, Leanne Unicom<sup>7</sup>, Alan E. Hubbard<sup>4</sup>, Stephen P. Luby<sup>8</sup>, Jessica A. Grembi<sup>8</sup>, John M. Colford, Jr.<sup>4</sup>, Benjamin F. Arnold<sup>9</sup>, Jade Benjamin-Chung<sup>3,6</sup>, Ayse Ercumen<sup>1</sup>

1. Department of Forestry and Environmental Resources, North Carolina State University, Raleigh, NC 27695
2. Division of Environmental Health Sciences, School of Public Health, University of California, Berkeley, CA 94720
3. Department of Epidemiology & Population Health, Stanford University School of Medicine, Stanford, CA 94305
4. Division of Epidemiology and Biostatistics, School of Public Health, University of California, Berkeley, CA 94720
5. Department of Civil and Environmental Engineering, University of California, Berkeley, CA 94720
6. Chan Zuckerberg Biohub, San Francisco, CA 94158
7. Environmental Health and WASH, Health System and Population Studies Division, icddr, Dhaka -1212, Bangladesh
8. Division of Infectious Diseases and Geographic Medicine, Stanford University School of Medicine, Stanford, CA 94305
9. Francis I. Proctor Foundation, University of California, San Francisco, CA 94143

\*Corresponding Author: Caitlin G. Niven, Jordan Hall Addition 2225, Raleigh, NC, 27606,  
+1 (415) 425 2910, [cgniven@ncsu.edu](mailto:cgniven@ncsu.edu)

Funding Sources: Bill & Melinda Gates Foundation, National Institutes of Health (NIH)

## Table of Contents

|                                                                                                                                                                                                                                                        |               |
|--------------------------------------------------------------------------------------------------------------------------------------------------------------------------------------------------------------------------------------------------------|---------------|
| <b>Table S1:</b> Number of samples collected by sample type and study round _____                                                                                                                                                                      | <b>Page 2</b> |
| <b>Table S2:</b> Percentages of samples within each weather category across different antecedent timeframes _____                                                                                                                                      | <b>Page 2</b> |
| <b>Table S3:</b> Intervention effects from improved on-site sanitation on log <sub>10</sub> -transformed <i>E. coli</i> counts by sample type in strata of extreme rainfall and temperature during antecedent periods timeframes _____                 | <b>Page 3</b> |
| <b>Table S4:</b> Intervention effects from improved on-site sanitation on log <sub>10</sub> -transformed <i>E. coli</i> counts by sample type in strata of above or below median rainfall and temperature during 2- and 7-day antecedent periods _____ | <b>Page 4</b> |
| <b>Table S5:</b> Intervention effects from improved on-site sanitation on log <sub>10</sub> -transformed <i>E. coli</i> counts by sample type in strata of heavy rainfall and elevated temperature during 2- and 7-day antecedent periods _____        | <b>Page 5</b> |
| <b>Figure S1:</b> Daily precipitation and monthly mean most probable number (MPN) of <i>E. coli</i> by sample type across the study period _____                                                                                                       | <b>Page 6</b> |
| <b>Figure S2:</b> Daily temperature and monthly mean most probable number (MPN) of <i>E. coli</i> by sample type across the study period _____                                                                                                         | <b>Page 7</b> |
| <b>Figure S3:</b> Forest plot of intervention effects from improved on-site sanitation on log <sub>10</sub> -transformed <i>E. coli</i> counts by sample type in strata of heavy rainfall and elevated temperature _____                               | <b>Page 8</b> |

**Table S1.** Number of samples collected by sample type and study round

| Round        | Round 1 | Round 2 | Round 3 | Round 4 | Round 5 | Round 6 | Round 7 | Round 8 | Round 9 | Total |
|--------------|---------|---------|---------|---------|---------|---------|---------|---------|---------|-------|
| Stored water | 1013    | 641     | 592     | 571     | 599     | 581     | 582     | 574     | 587     | 5740  |
| Food         | 1094    | 0       | 0       | 329     | 206     | 0       | 0       | 0       | 0       | 1629  |
| Mother hands | 0       | 720     | 705     | 684     | 682     | 668     | 662     | 643     | 633     | 5397  |
| Child hands  | 1170    | 720     | 705     | 682     | 673     | 653     | 650     | 626     | 615     | 6494  |
| Source water | 1098    | 0       | 0       | 0       | 0       | 0       | 0       | 0       | 0       | 1098  |
| Soil         | 1185    | 0       | 0       | 402     | 341     | 0       | 0       | 0       | 0       | 1928  |
| Ponds        | 557     | 0       | 0       | 0       | 0       | 0       | 0       | 0       | 0       | 557   |
| Flies        | 395     | 0       | 0       | 0       | 0       | 0       | 0       | 0       | 0       | 395   |
| <b>Total</b> | 6512    | 2081    | 2002    | 2668    | 2501    | 1902    | 1894    | 1843    | 1835    | 23238 |

**Table S2.** Percentages of samples (total n=23,238) within each weather category <sup>a</sup> across 2- and 7-day antecedent periods.

|                   | 2 Days        | 7 Days        |
|-------------------|---------------|---------------|
| No extreme rain   | 88.0% (20459) | 77.0% (17896) |
| Extreme rain      | 12.0% (2779)  | 23.0% (5342)  |
| No extreme temp   | 85.9% (19956) | 79.5% (18473) |
| Extreme temp      | 14.1% (3282)  | 20.5% (4765)  |
| No heavy rain     | 78.6% (18274) | 64.8% (15062) |
| Heavy rain        | 21.4% (4964)  | 35.2% (8176)  |
| No elevated temp  | 69.3% (16110) | 63% (14641)   |
| Elevated temp     | 30.7% (7128)  | 37% (8597)    |
| Below median rain | 49.3% (11446) | 49.0% (11379) |
| Above median rain | 50.7% (11792) | 51.0% (11859) |
| Below median temp | 52.5% (12193) | 51.1% (11867) |
| Above median temp | 47.5% (11045) | 48.9% (11371) |

<sup>a</sup> Extreme rain defined as  $\geq 28.20$  mm, extreme temperature defined as  $\geq 30.21$  °C, heavy defined as rain  $\geq 16.44$  mm, elevated temperature defined as  $\geq 29.29$  °C, median 2-day rolling average rain defined as  $\geq 0.27$  mm, median 2-day rolling average temperature defined as  $\geq 27.46$  °C, median 7-day rolling average rain defined as  $\geq 1.10$  mm, and median 7-day rolling average temperature defined as  $\geq 27.52$  °C.

**Table S3.** Improved on-site sanitation intervention effects <sup>a</sup> on log<sub>10</sub>-transformed *E. coli* counts by sample type in strata of extreme rainfall and temperature <sup>b</sup> during 2- and 7-day antecedent periods

|              | Rainfall            |              |                             |                  |              |                             |                     | Temperature            |              |                             |                     |              |                             |                     |
|--------------|---------------------|--------------|-----------------------------|------------------|--------------|-----------------------------|---------------------|------------------------|--------------|-----------------------------|---------------------|--------------|-----------------------------|---------------------|
|              | No Extreme Rainfall |              |                             | Extreme Rainfall |              |                             |                     | No Extreme Temperature |              |                             | Extreme Temperature |              |                             |                     |
|              | Control n           | Sanitation n | Δlog <sub>10</sub> (95% CI) | Control n        | Sanitation n | Δlog <sub>10</sub> (95% CI) | Interaction P-value | Control n              | Sanitation n | Δlog <sub>10</sub> (95% CI) | Control n           | Sanitation n | Δlog <sub>10</sub> (95% CI) | Interaction P-value |
| <b>2 Day</b> |                     |              |                             |                  |              |                             |                     |                        |              |                             |                     |              |                             |                     |
| Stored Water | 2496                | 2581         | <b>-0.08 (-0.15, -0.01)</b> | 318              | 345          | -0.05 (-0.19, 0.09)         | 0.68                | 2403                   | 2468         | -0.07 (-0.14, 0.00)         | 411                 | 458          | -0.12 (-0.29, 0.05)         | 0.53                |
| Food         | 706                 | 690          | 0.04 (-0.12, 0.19)          | 116              | 117          | 0.18 (-0.21, 0.56)          | 0.48                | 722                    | 714          | -0.12 (-0.04, 0.27)         | 100                 | 93           | -0.27 (-0.61, 0.08)         | <b>0.05</b>         |
| Mother Hands | 2321                | 2386         | -0.02 (-0.10, 0.05)         | 335              | 355          | -0.05 (-0.21, 0.12)         | 0.75                | 2185                   | 2224         | -0.01 (-0.08, 0.07)         | 471                 | 517          | -0.10 (-0.23, 0.03)         | <b>0.18</b>         |
| Child Hands  | 2829                | 2899         | <b>-0.06 (-0.13, 0.00)</b>  | 376              | 390          | -0.06 (-0.20, 0.07)         | 0.99                | 2737                   | 2770         | -0.04 (-0.10, 0.03)         | 468                 | 519          | <b>-0.22 (-0.36, -0.09)</b> | <b>0.01</b>         |
| Soil         | 834                 | 810          | -0.06 (-0.18, 0.06)         | 138              | 146          | -0.04 (-0.31, 0.24)         | 0.86                | 853                    | 847          | -0.01 (-0.13, 0.10)         | 119                 | 109          | <b>-0.40 (-0.70, -0.15)</b> | <b>0.01</b>         |
| Source Water | 523                 | 492          | -0.04 (-0.12, 0.04)         | 40               | 43           | -0.18 (-0.49, 0.13)         | 0.40                | 561                    | 529          | -0.05 (-0.13, 0.03)         | 2                   | 6            | -                           | -                   |
| Ponds        | 267                 | 261          | -0.07 (-0.21, 0.07)         | 10               | 19           | -0.40 (-0.94, 0.13)         | 0.25                | 276                    | 279          | -                           | 1                   | 1            | -                           | -                   |
| Flies        | 173                 | 191          | -0.13 (-0.44, 0.18)         | 20               | 11           | -0.90 (-2.30, 0.50)         | 0.29                | 192                    | 196          | -0.20 (-0.53, 0.13)         | 1                   | 6            | -                           | -                   |
| <b>7 Day</b> |                     |              |                             |                  |              |                             |                     |                        |              |                             |                     |              |                             |                     |
| Stored Water | 2177                | 2307         | <b>-0.08 (-0.16, -0.01)</b> | 637              | 619          | -0.03 (-0.15, 0.09)         | 0.41                | 2215                   | 2274         | <b>-0.08 (-0.16, -0.01)</b> | 599                 | 652          | -0.05 (-0.18, 0.07)         | 0.68                |
| Food         | 566                 | 576          | 0.08 (-0.10, 0.25)          | 256              | 231          | 0.09 (-0.23, 0.41)          | 0.93                | 673                    | 661          | 0.12 (-0.04, 0.27)          | 149                 | 146          | -0.16 (-0.49, 0.16)         | <b>0.12</b>         |
| Mother Hands | 2057                | 2142         | -0.02 (-0.09, 0.06)         | 599              | 599          | -0.05 (-0.17, 0.07)         | 0.55                | 1969                   | 2002         | -0.01 (-0.09, 0.08)         | 687                 | 739          | -0.05 (-0.17, 0.06)         | 0.50                |
| Child Hands  | 2463                | 2590         | <b>-0.07 (-0.14, -0.01)</b> | 742              | 699          | -0.02 (-0.12, 0.08)         | 0.27                | 2523                   | 2550         | -0.03 (-0.10, 0.04)         | 682                 | 739          | <b>-0.19 (-0.31, -0.07)</b> | <b>0.01</b>         |
| Soil         | 683                 | 692          | -0.05 (-0.19, 0.09)         | 289              | 264          | -0.08 (-0.25, 0.10)         | 0.82                | 787                    | 786          | 0.00 (-0.12, 0.11)          | 185                 | 170          | <b>-0.33 (-0.54, -0.12)</b> | <b>0.01</b>         |
| Source Water | 428                 | 430          | -0.04 (-0.13, 0.05)         | 135              | 105          | -0.07 (-0.25, 0.11)         | 0.76                | 561                    | 529          | -0.05 (-0.13, 0.03)         | 2                   | 6            | -                           | -                   |
| Ponds        | 248                 | 239          | 0.06 (-0.21, 0.10)          | 29               | 41           | -0.26 (-0.70, 0.18)         | 0.39                | 276                    | 279          | -                           | 1                   | 1            | -                           | -                   |
| Flies        | 136                 | 162          | 0.01 (-0.32, 0.33)          | 57               | 40           | <b>-0.91 (-1.65, -0.17)</b> | <b>0.03</b>         | 192                    | 196          | -0.20 (-0.53, 0.13)         | 1                   | 6            | -                           | -                   |

<sup>a</sup> Bolded values indicate p-value ≤ 0.05 for effect estimates and interaction p-value ≤ 0.2.

<sup>b</sup> Extreme rainfall defined as ≥ 28.20 mm, extreme temperature defined as ≥ 30.21 °C. We could not estimate intervention effects on source water (tubewells), ponds and flies following periods of extreme temperature due to data sparsity.

**Table S4.** Improved on-site sanitation intervention effects <sup>a</sup> on log10-transformed *E. coli* by sample type in strata of above or below median rolling average rainfall and temperature <sup>b</sup> during 2- and 7-day antecedent periods

|              | Rainfall              |              |                     |                           |              |                             |                     | Temperature              |              |                     |                              |              |                             |                     |
|--------------|-----------------------|--------------|---------------------|---------------------------|--------------|-----------------------------|---------------------|--------------------------|--------------|---------------------|------------------------------|--------------|-----------------------------|---------------------|
|              | Below Median Rainfall |              |                     | Median and Above Rainfall |              |                             |                     | Below Median Temperature |              |                     | Median and Above Temperature |              |                             |                     |
|              | Control n             | Sanitation n | Δlog10 (95% CI)     | Control n                 | Sanitation n | Δlog10 (95% CI)             | Interaction P-value | Control n                | Sanitation n | Δlog10 (95% CI)     | Control n                    | Sanitation n | Δlog10 (95% CI)             | Interaction P-value |
| <b>2 Day</b> |                       |              |                     |                           |              |                             |                     |                          |              |                     |                              |              |                             |                     |
| Stored Water | 1408                  | 1422         | -0.06 (-0.14, 0.03) | 1406                      | 1504         | <b>-0.09 (-0.17, -0.01)</b> | 0.52                | 1507                     | 1490         | -0.08 (-0.16, 0.01) | 1307                         | 1436         | <b>-0.09 (-0.17, 0.00)</b>  | 0.85                |
| Food         | 398                   | 392          | 0.18 (-0.02, 0.38)  | 424                       | 415          | 0.04 (-0.17, 0.24)          | 0.27                | 444                      | 428          | 0.06 (-0.11, 0.22)  | 378                          | 379          | 0.03 (-0.22, 0.27)          | 0.83                |
| Mother Hands | 1325                  | 1368         | 0.02 (-0.07, 0.11)  | 1331                      | 1373         | -0.06 (-0.15, 0.02)         | <b>0.12</b>         | 1410                     | 1424         | 0.02 (-0.08, 0.12)  | 1246                         | 1317         | -0.06 (-0.14, 0.02)         | <b>0.17</b>         |
| Child Hands  | 1601                  | 1616         | -0.02 (-0.09, 0.05) | 1604                      | 1673         | <b>-0.11 (-0.19, -0.02)</b> | <b>0.08</b>         | 1710                     | 1693         | -0.02 (-0.10, 0.05) | 1495                         | 1596         | <b>-0.11 (-0.20, -0.03)</b> | <b>0.05</b>         |
| Soil         | 482                   | 458          | -0.07 (-0.26, 0.12) | 490                       | 498          | -0.04 (-0.18, 0.10)         | 0.83                | 523                      | 494          | 0.00 (-0.15, 0.14)  | 449                          | 462          | -0.13 (-0.30, 0.03)         | 0.26                |
| Source Water | 277                   | 241          | -0.02 (-0.13, 0.09) | 286                       | 294          | -0.10 (-0.22, 0.02)         | 0.35                | 311                      | 265          | -0.04 (-0.13, 0.04) | 252                          | 270          | -0.10 (-0.35, 0.15)         | 0.71                |
| Ponds        | 130                   | 125          | -0.02 (-0.18, 0.14) | 147                       | 155          | -0.20 (-0.44, 0.03)         | 0.24                | 145                      | 139          | -0.09 (-0.22, 0.05) | 132                          | 141          | 0.03 (-0.53, 0.58)          | 0.70                |
| Flies        | 108                   | 95           | 0.01 (-0.40, 0.42)  | 85                        | 107          | -0.41 (-0.89, 0.06)         | <b>0.19</b>         | 108                      | 102          | -0.22 (-0.61, 0.17) | 85                           | 100          | -0.13 (-0.68, 0.43)         | 0.80                |
| <b>7 Day</b> |                       |              |                     |                           |              |                             |                     |                          |              |                     |                              |              |                             |                     |
| Stored Water | 1402                  | 1414         | -0.07 (-0.15, 0.02) | 1412                      | 1512         | <b>-0.09 (-0.17, -0.01)</b> | 0.67                | 1461                     | 1463         | -0.07 (-0.15, 0.02) | 1353                         | 1463         | <b>-0.08 (-0.17, 0.00)</b>  | 0.78                |
| Food         | 392                   | 387          | 0.11 (-0.10, 0.32)  | 430                       | 420          | 0.00 (-0.20, 0.20)          | 0.42                | 416                      | 428          | 0.12 (-0.06, 0.30)  | 406                          | 379          | 0.02 (-0.20, 0.24)          | 0.49                |
| Mother Hands | 1313                  | 1370         | 0.02 (-0.07, 0.11)  | 1343                      | 1371         | -0.06 (-0.15, 0.02)         | <b>0.11</b>         | 1363                     | 1399         | 0.00 (-0.09, 0.10)  | 1293                         | 1342         | -0.05 (-0.13, 0.04)         | 0.37                |
| Child Hands  | 1589                  | 1613         | -0.03 (-0.10, 0.04) | 1616                      | 1676         | <b>-0.10 (-0.17, -0.02)</b> | <b>0.11</b>         | 1648                     | 1665         | -0.04 (-0.12, 0.03) | 1557                         | 1624         | <b>-0.09 (-0.17, 0.00)</b>  | 0.37                |
| Soil         | 473                   | 455          | -0.05 (-0.25, 0.15) | 499                       | 501          | -0.08 (-0.21, 0.06)         | 0.82                | 499                      | 493          | 0.03 (-0.12, 0.18)  | 473                          | 463          | <b>-0.17 (-0.31, -0.03)</b> | <b>0.05</b>         |
| Source Water | 278                   | 244          | -0.02 (-0.13, 0.09) | 285                       | 291          | -0.10 (-0.21, 0.02)         | 0.36                | 294                      | 262          | -0.05 (-0.13, 0.04) | 269                          | 273          | -0.08 (-0.32, 0.16)         | 0.80                |
| Ponds        | 131                   | 118          | 0.00 (-0.18, 0.17)  | 146                       | 162          | <b>-0.25 (-0.48, -0.03)</b> | <b>0.10</b>         | 136                      | 138          | -0.06 (-0.20, 0.07) | 141                          | 142          | -0.32 (-0.78, 0.14)         | 0.30                |
| Flies        | 96                    | 104          | 0.03 (-0.39, 0.45)  | 97                        | 98           | -0.45 (-0.94, 0.04)         | <b>0.15</b>         | 102                      | 100          | -0.27 (-0.67, 0.13) | 91                           | 102          | 0.05 (-0.53, 0.63)          | 0.40                |

<sup>a</sup> Bolded values indicate p-value ≤ 0.05 for effect estimates and interaction p-value ≤ 0.2.

<sup>b</sup> Median 2-day rolling average rain defined as ≥ 0.27 mm, median 2-day rolling temperature defined as ≥ 27.46°C, median 7-day rolling average rain defined as ≥ 1.10 mm and median 7-day rolling average temperature defined as ≥ 27.52°C.

**Table S5.** Improved on-site sanitation intervention effects <sup>a</sup> on log10-transformed *E. coli* counts by sample type in strata of heavy rainfall and elevated temperature <sup>b</sup> during 2- and 7-day antecedent periods.

|              | Rainfall          |              |                             |                |              |                             |                     | Temperature             |              |                     |                      |              |                             |                     |
|--------------|-------------------|--------------|-----------------------------|----------------|--------------|-----------------------------|---------------------|-------------------------|--------------|---------------------|----------------------|--------------|-----------------------------|---------------------|
|              | No Heavy Rainfall |              |                             | Heavy Rainfall |              |                             |                     | No Elevated Temperature |              |                     | Elevated Temperature |              |                             |                     |
|              | Control n         | Sanitation n | Δlog10 (95% CI)             | Control n      | Sanitation n | Δlog10 (95% CI)             | Interaction P-value | Control n               | Sanitation n | Δlog10 (95% CI)     | Control n            | Sanitation n | Δlog10 (95% CI)             | Interaction P-value |
| <b>2 Day</b> |                   |              |                             |                |              |                             |                     |                         |              |                     |                      |              |                             |                     |
| Stored Water | 2214              | 2345         | <b>-0.08 (-0.15, -0.01)</b> | 600            | 581          | -0.04 (-0.15, 0.07)         | 0.53                | 2027                    | 2114         | -0.05 (-0.13, 0.02) | 787                  | 812          | <b>-0.13 (-0.26, -0.01)</b> | 0.27                |
| Food         | 598               | 604          | 0.03 (-0.14, 0.20)          | 224            | 203          | 0.21 (-0.08, 0.50)          | 0.28                | 625                     | 616          | 0.16 (-0.01, 0.32)  | 197                  | 191          | -0.22 (-0.50, 0.06)         | <b>0.02</b>         |
| Mother Hands | 2062              | 2143         | -0.02 (-0.10, 0.05)         | 594            | 598          | -0.02 (-0.14, 0.10)         | 0.95                | 1777                    | 1838         | -0.01 (-0.10, 0.07) | 879                  | 903          | -0.05 (-0.14, 0.04)         | 0.50                |
| Child Hands  | 2518              | 2623         | -0.06 (-0.13, 0.00)         | 687            | 666          | -0.07 (-0.18, 0.04)         | 0.94                | 2317                    | 2375         | -0.04 (-0.11, 0.03) | 888                  | 914          | <b>-0.13 (-0.24, -0.02)</b> | <b>0.14</b>         |
| Soil         | 704               | 717          | -0.07 (-0.20, 0.06)         | 268            | 239          | -0.04 (-0.25, 0.16)         | 0.83                | 729                     | 733          | 0.00 (-0.12, 0.12)  | 243                  | 223          | <b>-0.26 (-0.45, -0.06)</b> | <b>0.03</b>         |
| Source Water | 467               | 463          | -0.04 (-0.12, 0.04)         | 96             | 72           | -0.10 (-0.35, 0.15)         | 0.64                | 0                       | 41           | -0.05 (-0.13, 0.04) | 545                  | 512          | -0.23 (-0.69, 0.23)         | 0.44                |
| Ponds        | 233               | 246          | -0.04 (-0.19, 0.11)         | 44             | 34           | -0.13 (-0.32, 0.05)         | 0.45                | 270                     | 275          | -0.08 (-0.22, 0.05) | 7                    | 5            | <b>-0.38 (-0.59, -0.17)</b> | <b>0.01</b>         |
| Flies        | 154               | 183          | -0.11 (-0.44, 0.22)         | 39             | 19           | -0.71 (-1.56, 0.13)         | <b>0.20</b>         | 187                     | 186          | -0.22 (-0.56, 0.12) | 6                    | 16           | 0.20 (-0.63, 1.03)          | 0.37                |
| <b>7 Day</b> |                   |              |                             |                |              |                             |                     |                         |              |                     |                      |              |                             |                     |
| Stored Water | 1830              | 1967         | <b>-0.08 (-0.16, 0.00)</b>  | 984            | 959          | -0.05 (-0.14, 0.04)         | 0.58                | 1714                    | 1777         | -0.07 (-0.15, 0.01) | 1100                 | 1149         | -0.09 (-0.18, 0.01)         | 0.79                |
| Food         | 450               | 463          | 0.09 (-0.10, 0.28)          | 372            | 344          | 0.08 (-0.15, 0.32)          | 0.99                | 547                     | 546          | 0.16 (-0.01, 0.32)  | 275                  | 261          | -0.09 (-0.36, 0.18)         | <b>0.11</b>         |
| Mother Hands | 1735              | 1809         | -0.01 (-0.09, 0.07)         | 921            | 932          | -0.05 (-0.14, 0.04)         | 0.44                | 1442                    | 1478         | -0.01 (-0.10, 0.08) | 1214                 | 1263         | -0.04 (-0.12, 0.05)         | 0.60                |
| Child Hands  | 2084              | 2199         | -0.06 (-0.12, 0.01)         | 1121           | 1090         | -0.08 (-0.17, 0.01)         | 0.62                | 1958                    | 1997         | -0.05 (-0.12, 0.02) | 1247                 | 1292         | <b>-0.08 (-0.17, 0.01)</b>  | 0.56                |
| Soil         | 544               | 560          | -0.04 (-0.20, 0.11)         | 428            | 396          | -0.08 (-0.23, 0.08)         | 0.76                | 632                     | 640          | 0.00 (-0.13, 0.14)  | 340                  | 316          | <b>-0.18 (-0.33, -0.03)</b> | <b>0.06</b>         |
| Source Water | 369               | 377          | -0.02 (-0.12, 0.07)         | 194            | 158          | -0.10 (-0.26, 0.06)         | 0.42                | 521                     | 493          | -0.05 (-0.14, 0.03) | 42                   | 42           | -0.06 (-0.42, 0.31)         | 0.98                |
| Ponds        | 214               | 203          | -0.03 (-0.20, 0.13)         | 63             | 77           | -0.22 (-0.47, 0.03)         | 0.24                | 261                     | 273          | -0.08 (-0.22, 0.05) | 16                   | 7            | <b>-0.31 (-0.50, -0.13)</b> | <b>0.04</b>         |
| Flies        | 115               | 143          | 0.01 (-0.35, 0.37)          | 78             | 59           | <b>-0.62 (-1.19, -0.05)</b> | <b>0.07</b>         | 179                     | 183          | -0.22 (-0.57, 0.13) | 14                   | 19           | -0.04 (-0.75, 0.66)         | 0.67                |

<sup>a</sup> Bolded values indicate p-value ≤ 0.05 for effect estimates and interaction p-value ≤ 0.2.

<sup>b</sup> Heavy rainfall defined as ≥ 28.20 mm and elevated temperature defined as ≥ 29.29°C

**Figure S1:** Daily precipitation and monthly mean most probable number (MPN) of *E. coli* by sample type across the study period

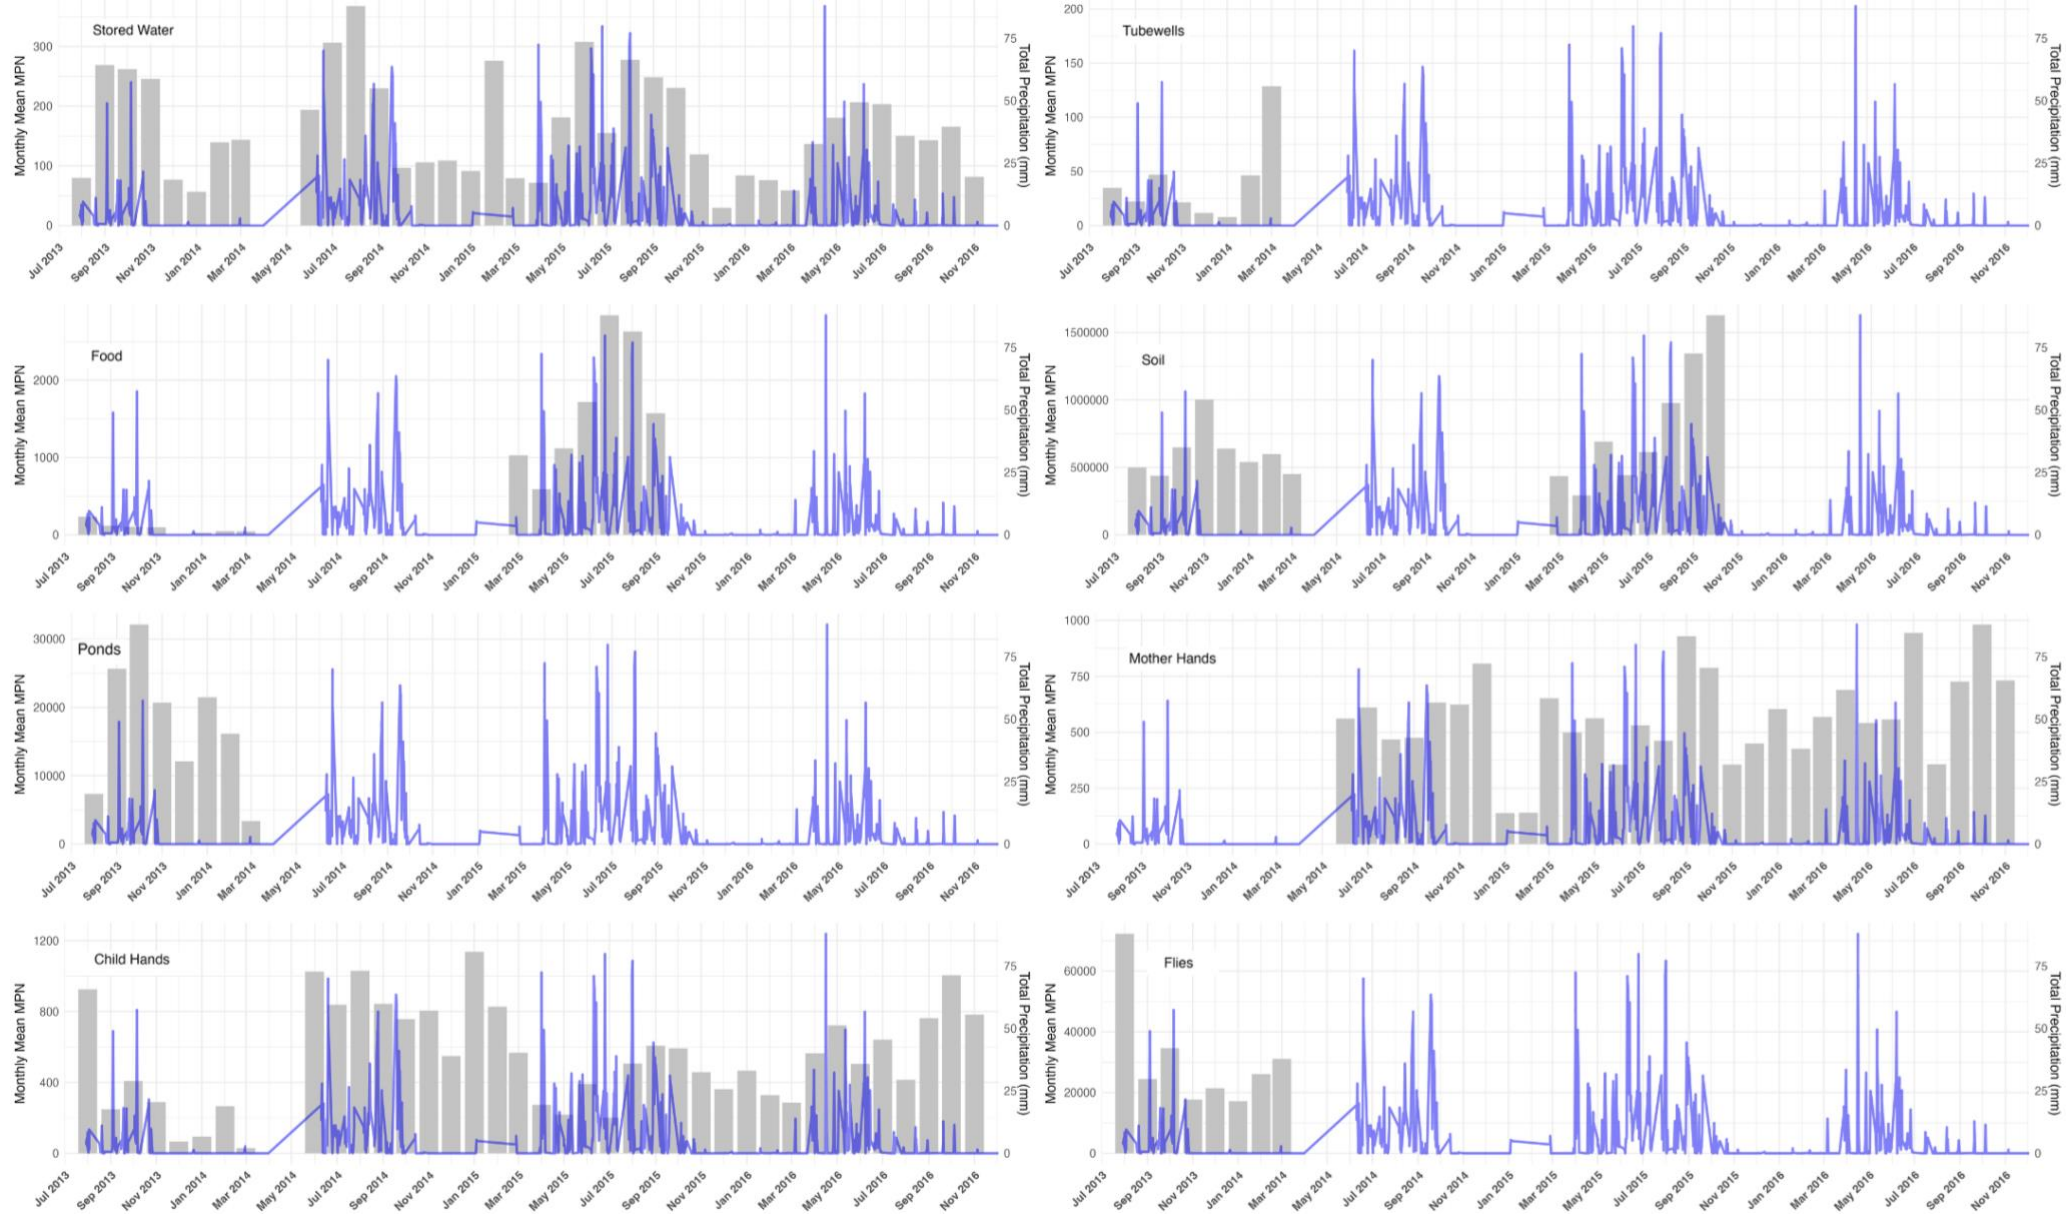

**Figure S2:** Daily temperature and monthly mean most probable number (MPN) of *E. coli* by sample type across the study period

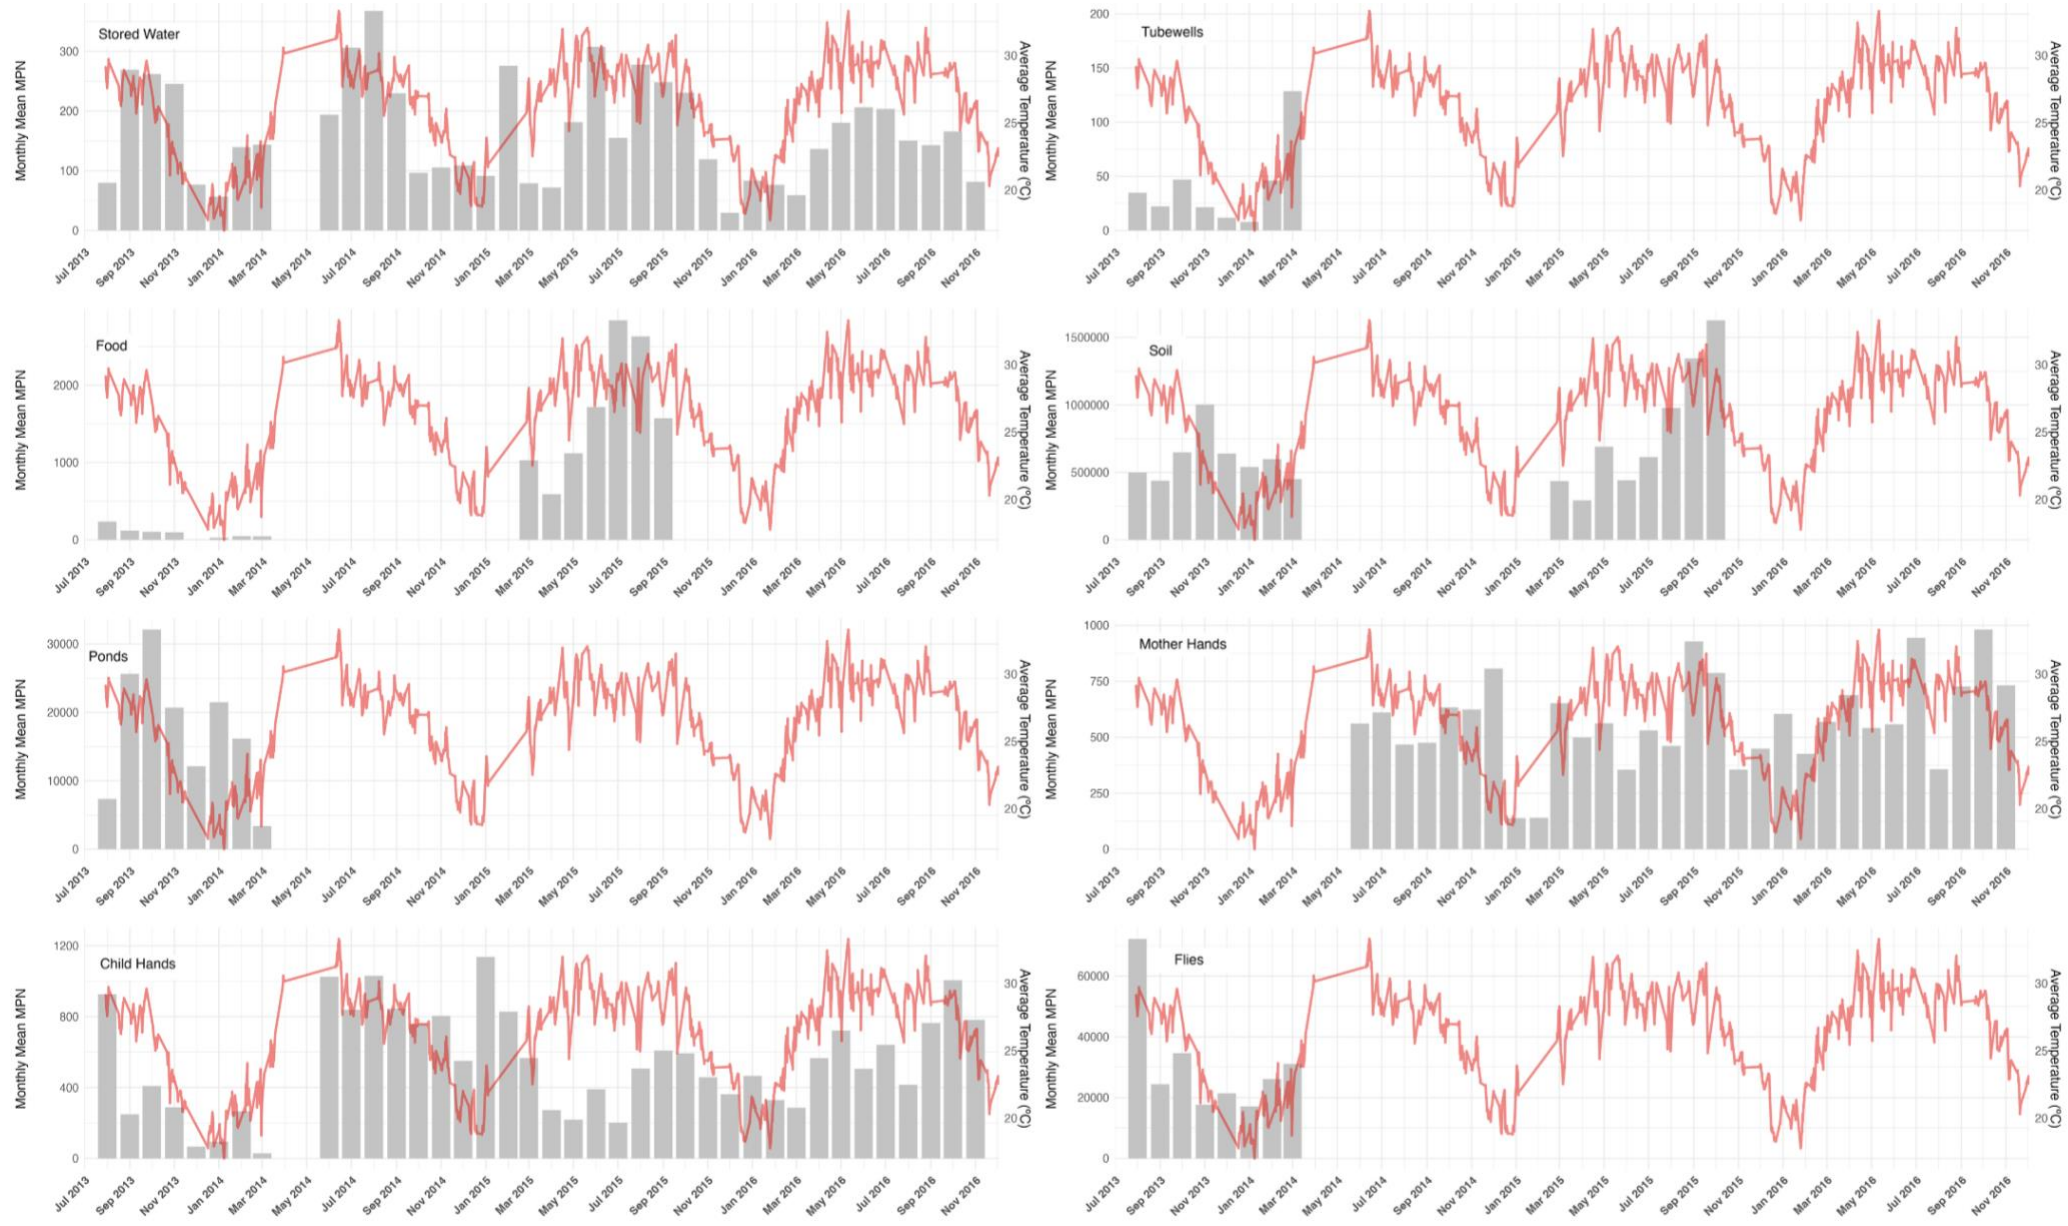

**Figure S3.** Forest plot of intervention effects from improved on-site sanitation on log<sub>10</sub>-transformed *E. coli* counts by sample type in strata of heavy rainfall and elevated temperature<sup>a</sup>

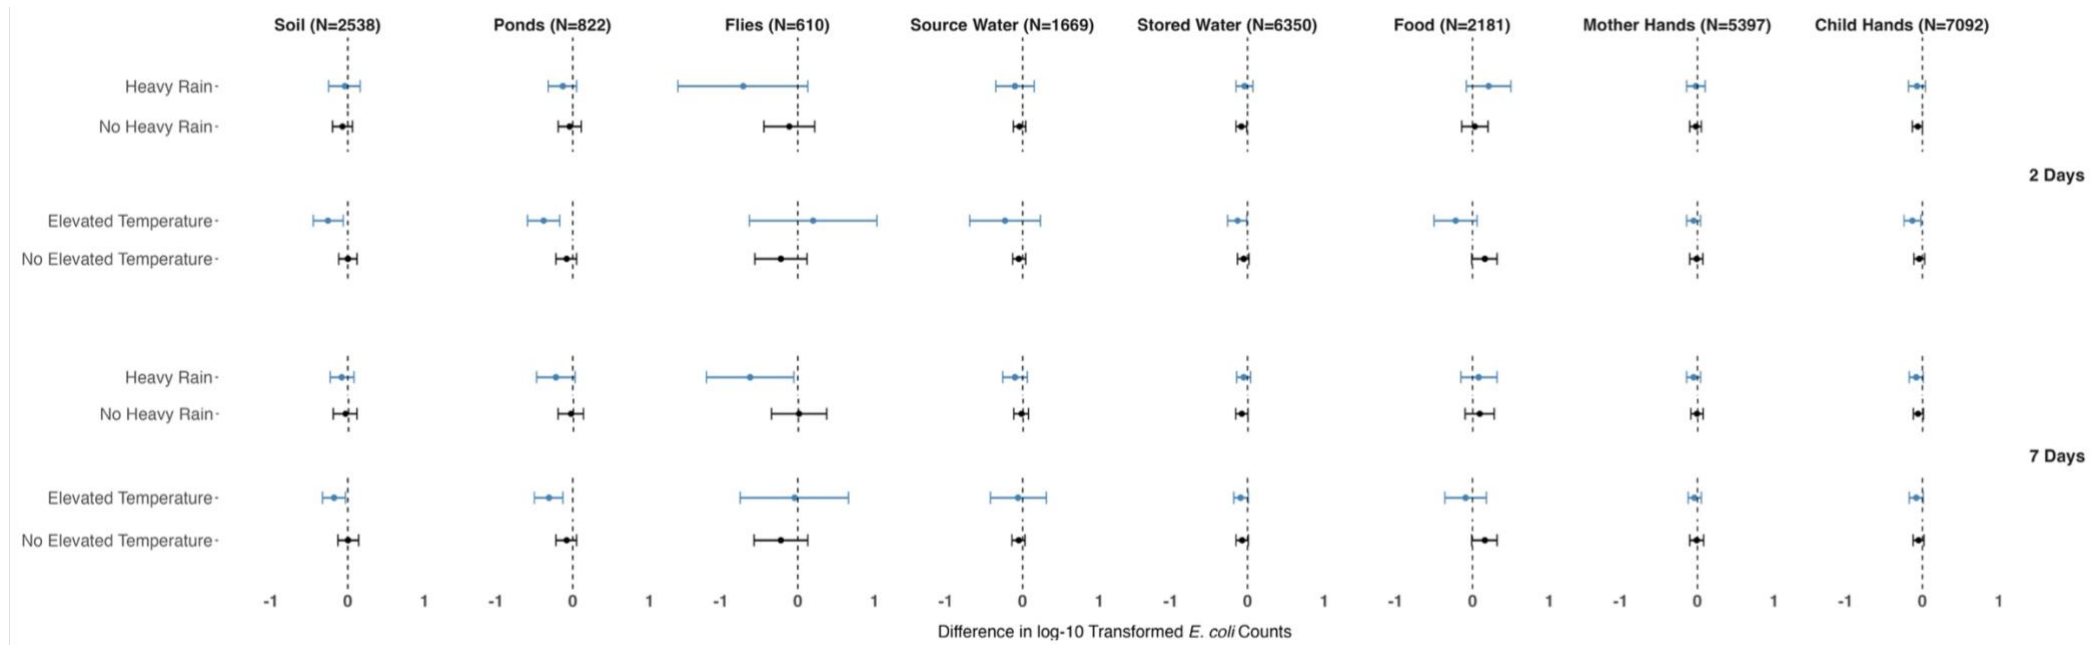

<sup>a</sup> Heavy rainfall defined as  $\geq 16.44$  mm and elevated temperature defined as  $\geq 29.29^\circ\text{C}$ .
